# Supplementary material
Source: ML conference proceedings conference paper supplement (https://openaccess.thecvf.com/content/WACV_2020/html/Dhamija_The_Overlooked_Elephant_WACV_2020_paper.html)
Supplement: Supplementary file 1 [file Dhamija_The_Overlooked_Elephant_WACV_2020_supplemental.pdf]

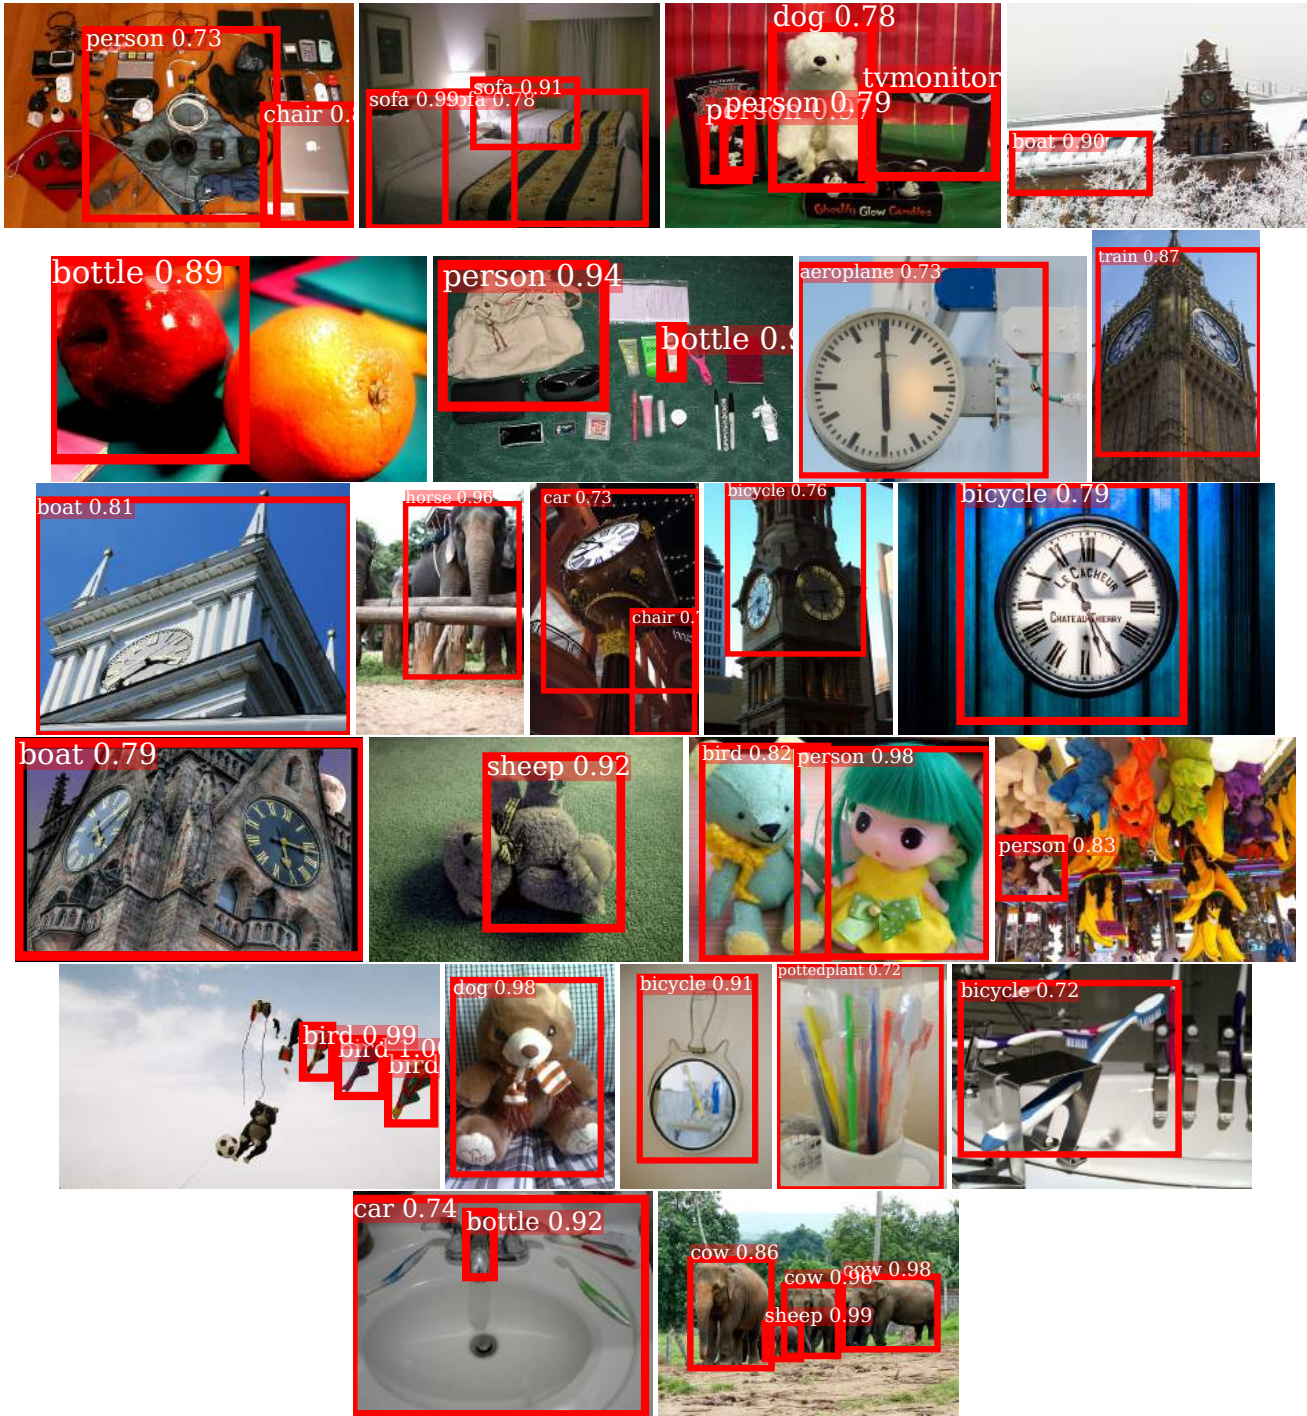

Figure 1: MISDETECTIONS FROM FASTER R-CNN These results are from the Faster R-CNN network used in our paper. The network was trained on the PASCAL VOC 2007-2012 training and validation set while the above images belong to MSCOCO dataset. Ideally, the network was supposed to reject all the above detections as background.



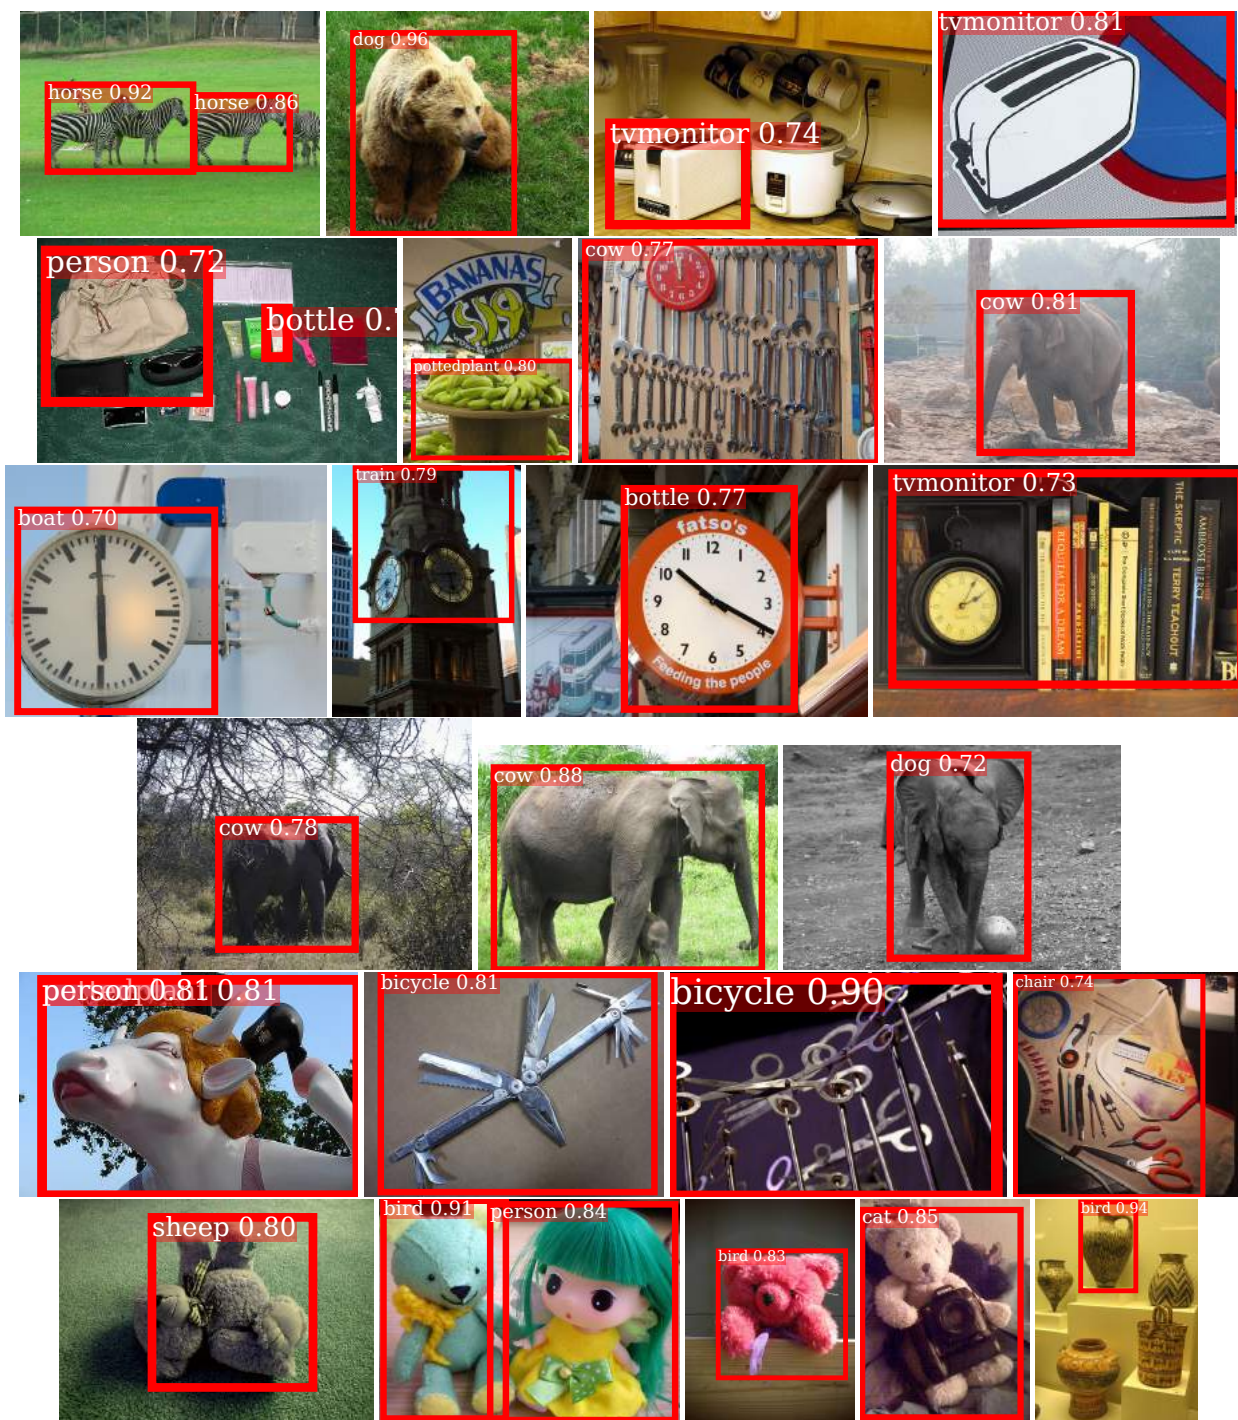

Figure 2: MISDETECTION FROM RETINANET These results are from the RetinaNet network used in our paper. The network was trained on the PASCAL VOC 2007-2012 training and validation set while the above images belong to MSCOCO dataset. Ideally the network was supposed to reject all the above detections as background.

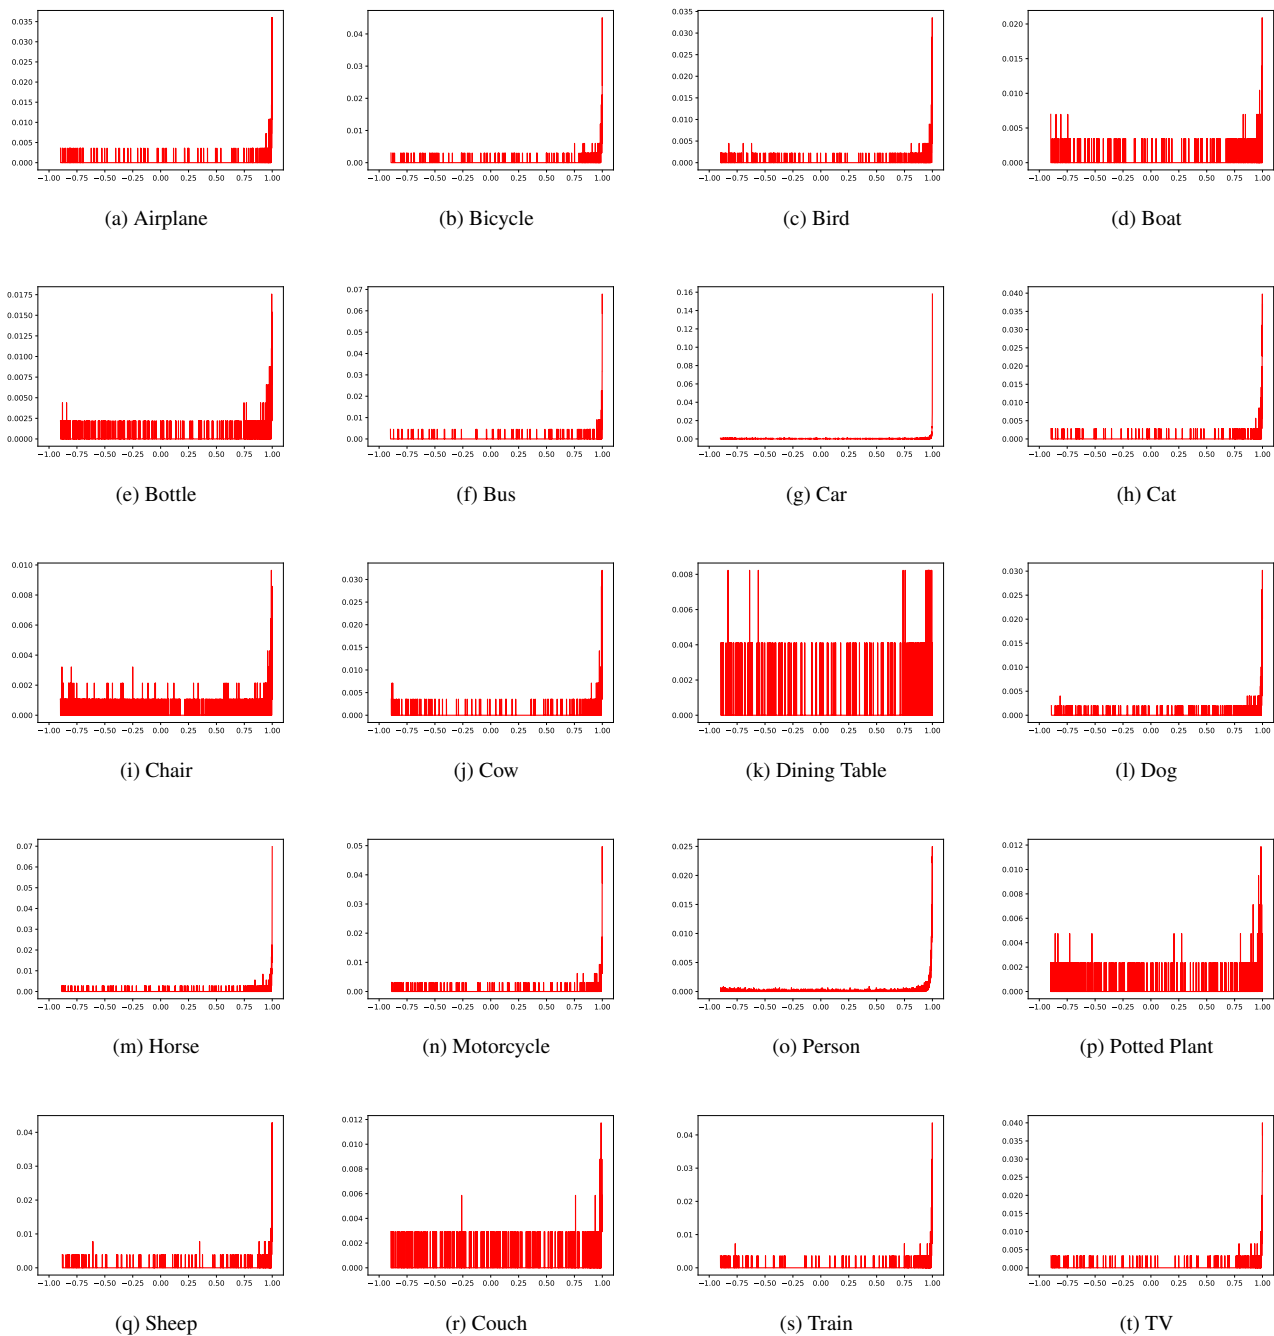

Figure 3: OBJECT VS BACKGROUND PROBABILITY DISTRIBUTION *One might think that for open set detections it would be sufficient to reject when the background class is greater than any other class. Unfortunately, this fails miserably. To see why, we compare the distribution of probability scores of correct detections ( $p_i$ ) to background probability ( $p_b$ ) for Faster R-CNN on the PASCAL VOC 2007 test set. This figure shows the histogram of  $(p_i - p_b)$ , with the x-axis ranging from  $-1$  ( $p_i = 0, p_b = 1$ ) to  $1$  ( $p_i = 1, p_b = 0$ ). As seen in the histograms, for a significant number of detections the difference is negative, i.e., the probability score for an ROI being background is higher than the probability for the actual object in the ROI. We also summarize the Mean and Standard Deviation values for each of the classes in Table 1. As explained in Section 2 of the main paper (Multi-Class Classifiers with Background), this skew indicates that we should not perform the evaluation as for a classification problem.*

| <b>Class</b> | <b>Mean</b> | <b>Standard Deviation</b> |
|--------------|-------------|---------------------------|
| aeroplane    | 0.66        | 0.598                     |
| bicycle      | 0.6842      | 0.539                     |
| bird         | 0.6129      | 0.6284                    |
| boat         | 0.3873      | 0.6842                    |
| bottle       | 0.4747      | 0.6718                    |
| bus          | 0.6737      | 0.5411                    |
| car          | 0.6555      | 0.5947                    |
| cat          | 0.7638      | 0.4953                    |
| chair        | 0.2317      | 0.6881                    |
| cow          | 0.6331      | 0.6023                    |
| diningtable  | 0.264       | 0.6867                    |
| dog          | 0.7326      | 0.4882                    |
| horse        | 0.7319      | 0.5088                    |
| motorbike    | 0.6125      | 0.6161                    |
| person       | 0.6157      | 0.611                     |
| pottedplant  | 0.2321      | 0.7348                    |
| sheep        | 0.5874      | 0.6021                    |
| sofa         | 0.3421      | 0.6321                    |
| train        | 0.6825      | 0.5756                    |
| tvmonitor    | 0.653       | 0.5939                    |

Table 1: OBJECT VS BACKGROUND PROBABILITY DISTRIBUTION

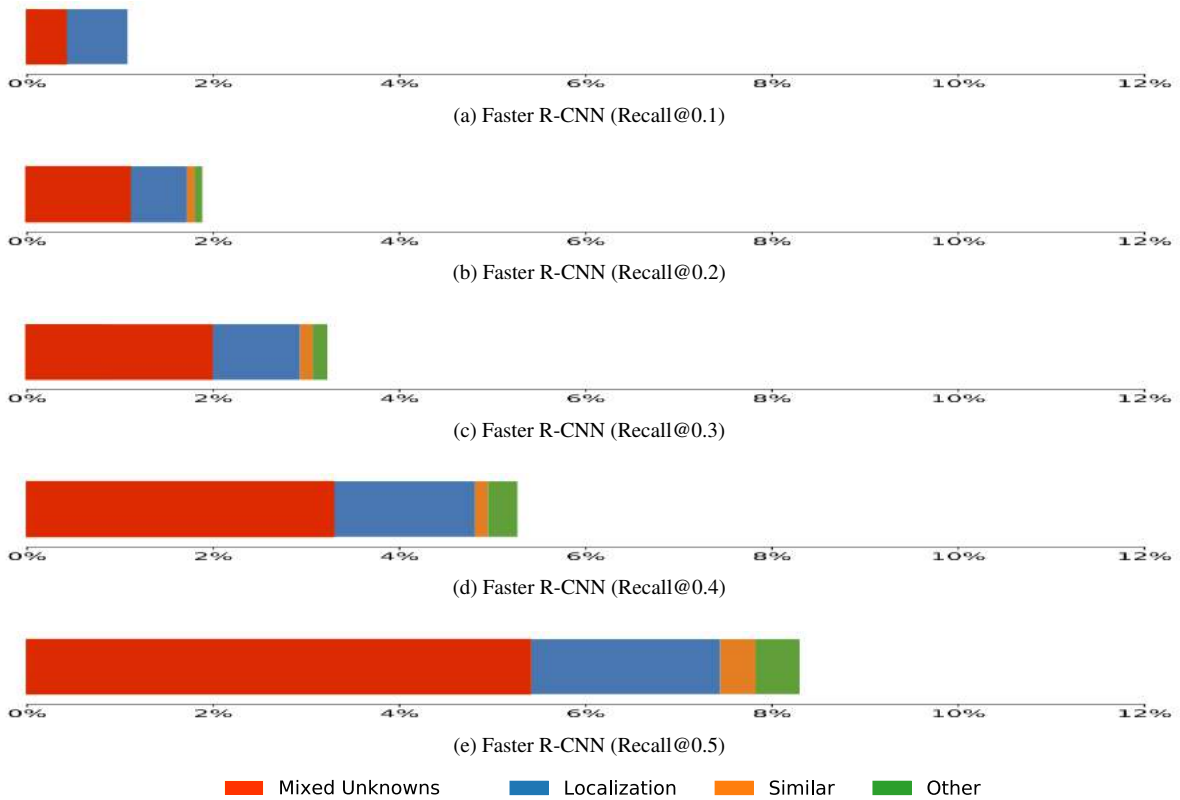

Figure 4: IMPACT OF UNKNOWNNS AT WRI ON FASTER RCNN *The errors are plot upto 12% the white region upto 100% representing correct detections. From the magnitude of the unknown unknowns it may be observed that the detectors rapidly confuse objects they were not trained to identify with known objects with an IOU  $\geq 0.1$ .*

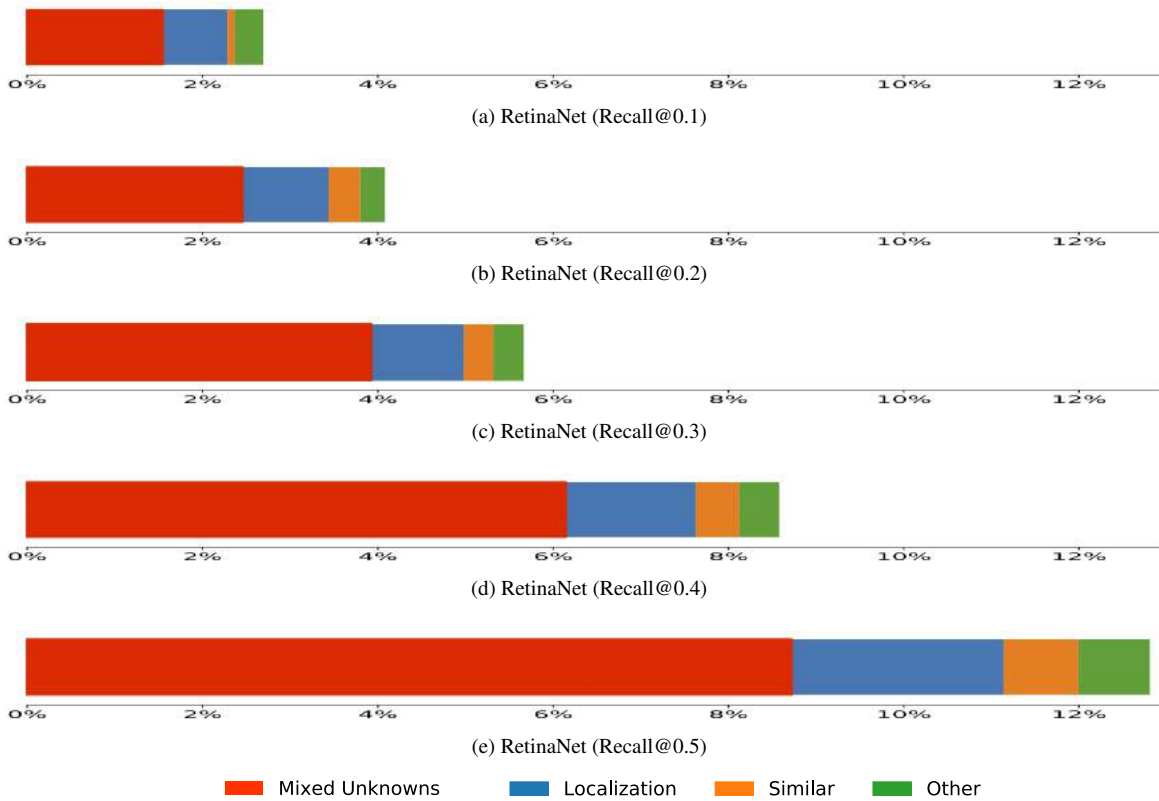

Figure 5: IMPACT OF UNKNOWN S AT WR1 ON RETINANET The errors are plot upto 13% the white region upto 100% representing correct detections.

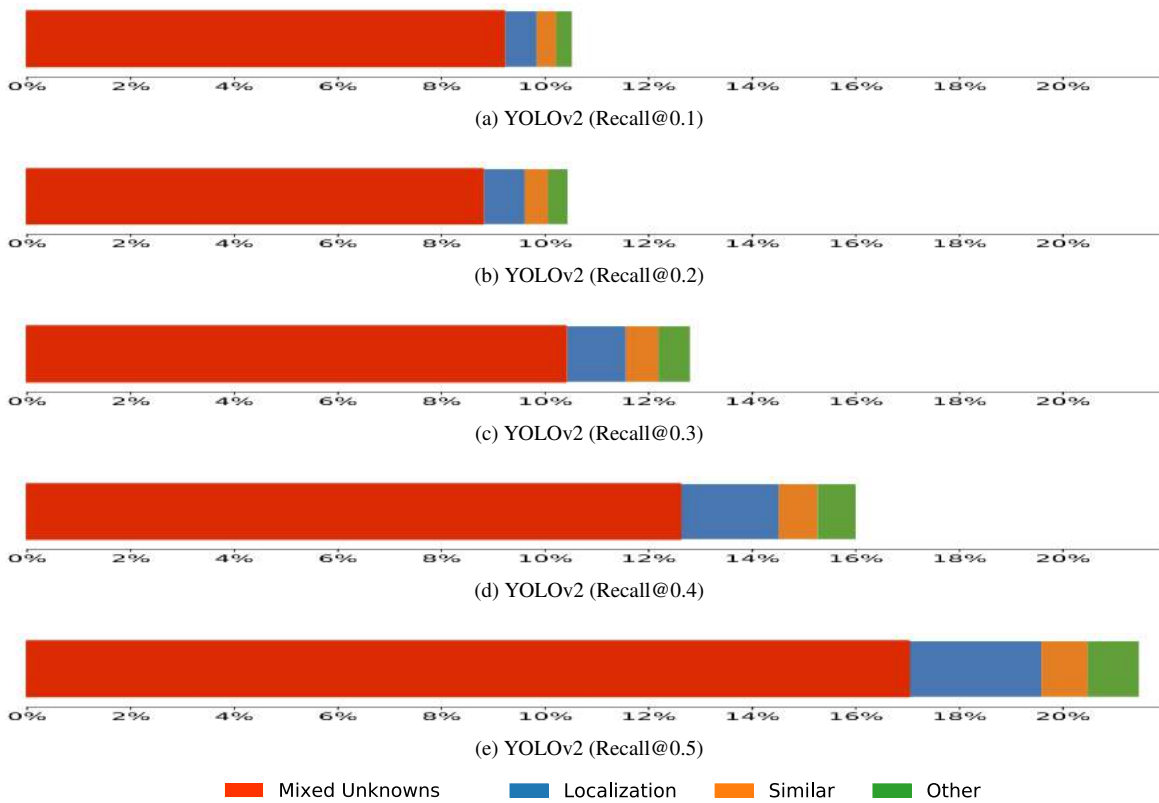

Figure 6: IMPACT OF UNKNOWNNS AT WR1 ON YOLOV2 The errors are plot upto 22% the white region upto 100% representing correct detections.

| $WR$ | $\beta=0.5$ |       |        |       | $\beta=1.0$ |       |        |       | $\beta=1.5$ |       |        |       |
|------|-------------|-------|--------|-------|-------------|-------|--------|-------|-------------|-------|--------|-------|
|      | F Score     | Prec. | Recall | Thre. | F Score     | Prec. | Recall | Thre. | F Score     | Prec. | Recall | Thre. |
| 0.0  | 0.85        | 87.91 | 77.46  | 0.62  | 0.83        | 79.25 | 86.07  | 0.49  | 0.84        | 78.52 | 86.89  | 0.48  |
| 0.25 | 0.81        | 87.38 | 73.77  | 0.65  | 0.80        | 87.38 | 73.77  | 0.65  | 0.81        | 69.51 | 86.89  | 0.48  |
| 0.5  | 0.75        | 84.39 | 70.90  | 0.69  | 0.77        | 81.08 | 73.77  | 0.65  | 0.77        | 65.19 | 84.43  | 0.51  |
| 0.75 | 0.68        | 82.23 | 66.39  | 0.72  | 0.74        | 76.89 | 70.90  | 0.69  | 0.75        | 68.98 | 77.46  | 0.62  |
| 1.0  | 0.65        | 70.87 | 73.77  | 0.65  | 0.72        | 70.87 | 73.77  | 0.65  | 0.73        | 65.85 | 77.46  | 0.62  |
| 1.25 | 0.63        | 71.19 | 70.90  | 0.69  | 0.71        | 71.19 | 70.90  | 0.69  | 0.72        | 62.17 | 77.46  | 0.62  |
| 1.5  | 0.61        | 75.36 | 65.16  | 0.73  | 0.70        | 75.36 | 65.16  | 0.73  | 0.71        | 64.75 | 73.77  | 0.65  |
| 1.75 | 0.58        | 71.30 | 65.16  | 0.73  | 0.68        | 71.30 | 65.16  | 0.73  | 0.69        | 60.40 | 73.77  | 0.65  |
| 2.0  | 0.57        | 69.43 | 65.16  | 0.73  | 0.67        | 69.43 | 65.16  | 0.73  | 0.68        | 57.88 | 73.77  | 0.65  |
| 2.25 | 0.54        | 72.06 | 60.25  | 0.77  | 0.66        | 67.83 | 63.93  | 0.74  | 0.67        | 59.45 | 70.90  | 0.69  |
| 2.5  | 0.52        | 69.34 | 60.25  | 0.77  | 0.64        | 69.34 | 60.25  | 0.77  | 0.65        | 55.45 | 70.90  | 0.69  |
| 2.75 | 0.49        | 65.04 | 60.25  | 0.77  | 0.63        | 65.04 | 60.25  | 0.77  | 0.64        | 51.95 | 70.90  | 0.69  |
| 3.0  | 0.49        | 64.47 | 60.25  | 0.77  | 0.62        | 64.47 | 60.25  | 0.77  | 0.63        | 50.44 | 70.90  | 0.69  |
| 3.25 | 0.47        | 62.82 | 60.25  | 0.77  | 0.62        | 62.82 | 60.25  | 0.77  | 0.62        | 57.45 | 64.75  | 0.74  |
| 3.5  | 0.46        | 61.51 | 60.25  | 0.77  | 0.61        | 61.51 | 60.25  | 0.77  | 0.62        | 56.23 | 64.75  | 0.74  |
| 3.75 | 0.45        | 59.51 | 60.25  | 0.77  | 0.60        | 59.51 | 60.25  | 0.77  | 0.61        | 54.30 | 64.75  | 0.74  |
| 4.0  | 0.44        | 58.57 | 60.25  | 0.77  | 0.59        | 58.57 | 60.25  | 0.77  | 0.61        | 52.84 | 64.75  | 0.74  |
| 4.25 | 0.42        | 55.89 | 60.25  | 0.77  | 0.58        | 56.64 | 59.43  | 0.77  | 0.60        | 50.64 | 64.75  | 0.74  |

Table 2: USING  $F_\beta$  TO SELECT OPERATING POINT FOR COW We show various values of  $\beta$  that might be used to choose an operating point for RetinaNet in order to detect the cow class. For a provided set of detections, the threshold that provides the maximum value of  $F_\beta$  is chosen. For each such operating point we provide the threshold,  $F_\beta$  score, precision and recall values. The operating point may also be chosen at various levels of open-set conditions or wilderness ratios ( $WR$ ). It may be observed from the above table that the thresholds selected for a specific value of  $\beta$  at a certain wilderness ratio do not generalize to other levels of wilderness.
